# Supplementary material for: Combined Effects of Ziziphus jujuba, Dimocarpus longan, and Lactuca sativa on Sleep-Related Behaviors through GABAergic Signaling
Source: MDPI journal article supplement (doi:10.3390/foods13010001), 2023-12-19
Supplement: s1 [file s1]

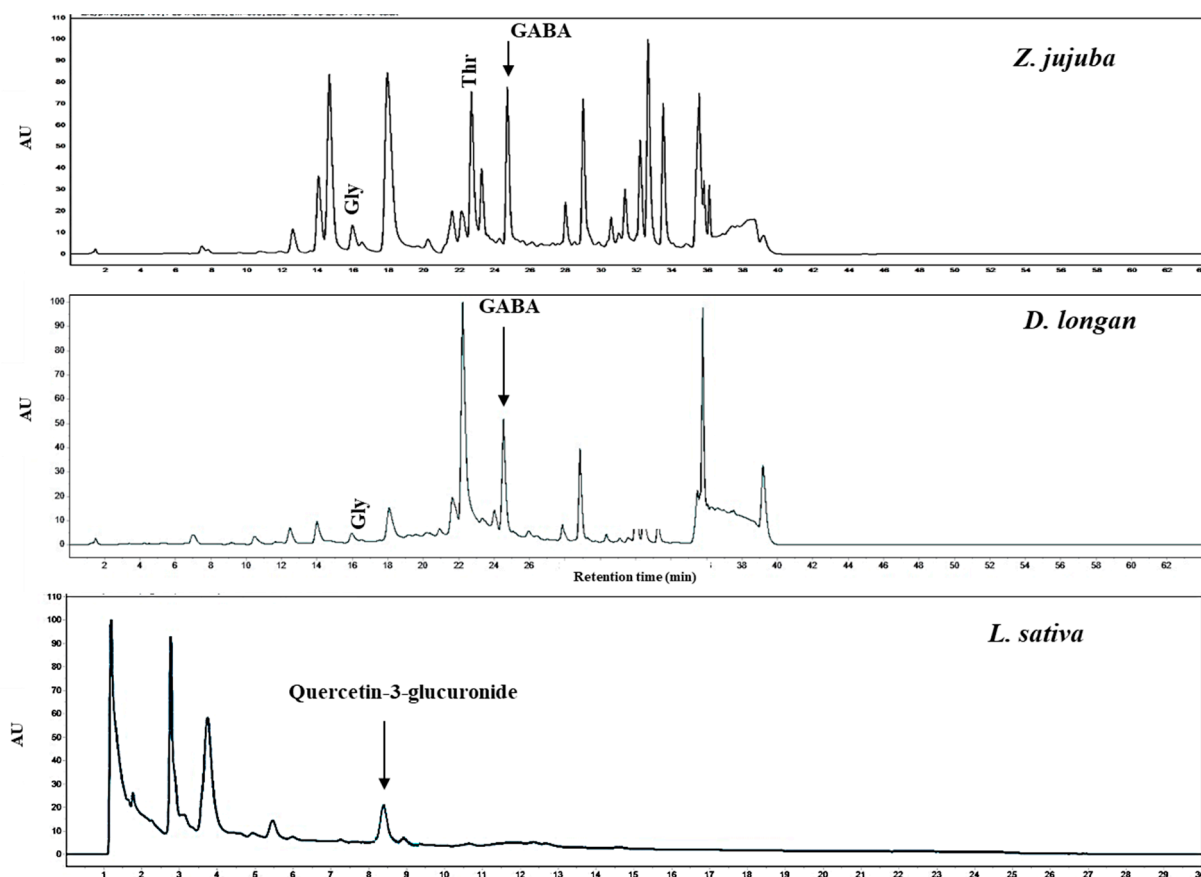

Supplementary Figure S1. High-performance liquid chromatography of glycine, threonine, GABA and in the water extract of *L. sativa*, *Z. jujuba* and *D. longan*. GABA, gamma-aminobutyric acid; Q3G, quercetin-3-glucuronide
